# Supplementary material for: The pH-controlled hydrothermal synthesis and crystal structures of two zinc N,N′-piperazinebis(methylenephosphonate) frameworks
Source: Royal Society of Chemistry journal article supplement (doi:10.1039/b502417j), 2005-01-01

## The pH-controlled hydrothermal synthesis and crystal structures of two zinc N,N'-piperazinebis(methylenephosphonate) frameworks

John A. Groves, Paul A. Wright and Philip Lightfoot\*

School of Chemistry, University of St Andrews, St Andrews, Fife, KY16 9ST, UK

### Supplementary Information

Figure S1.

Experimental X-ray powder diffraction pattern for phase I, and the pattern simulated on the basis of the crystal structure.

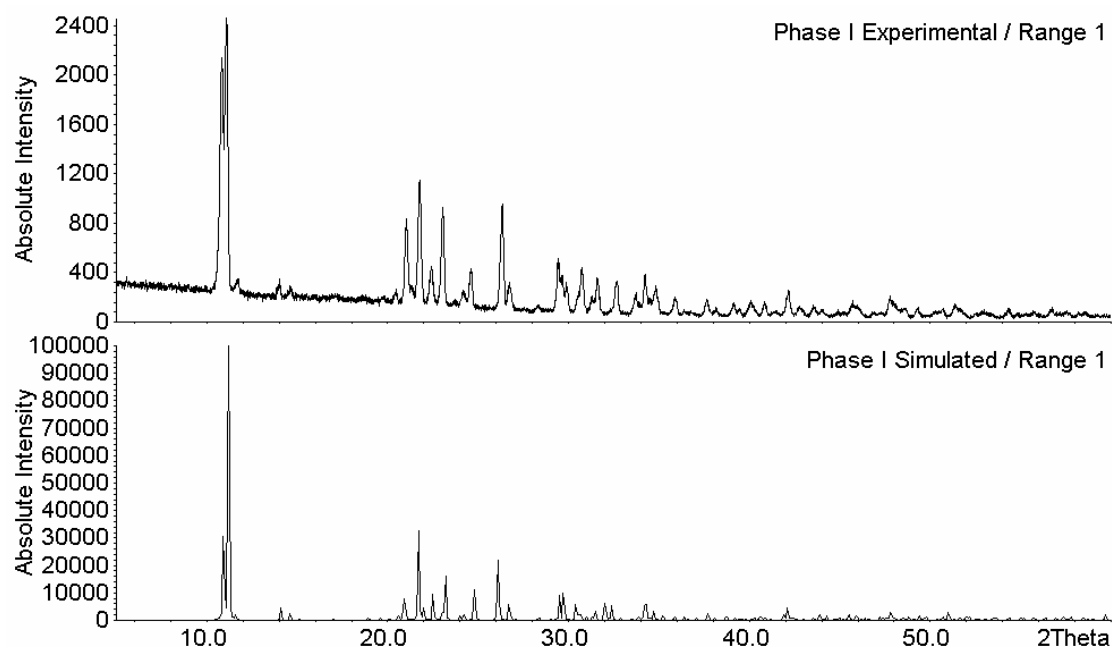

**Figure S2.**

Experimental X-ray powder diffraction pattern for phase II, and the pattern simulated on the basis of the crystal structure.

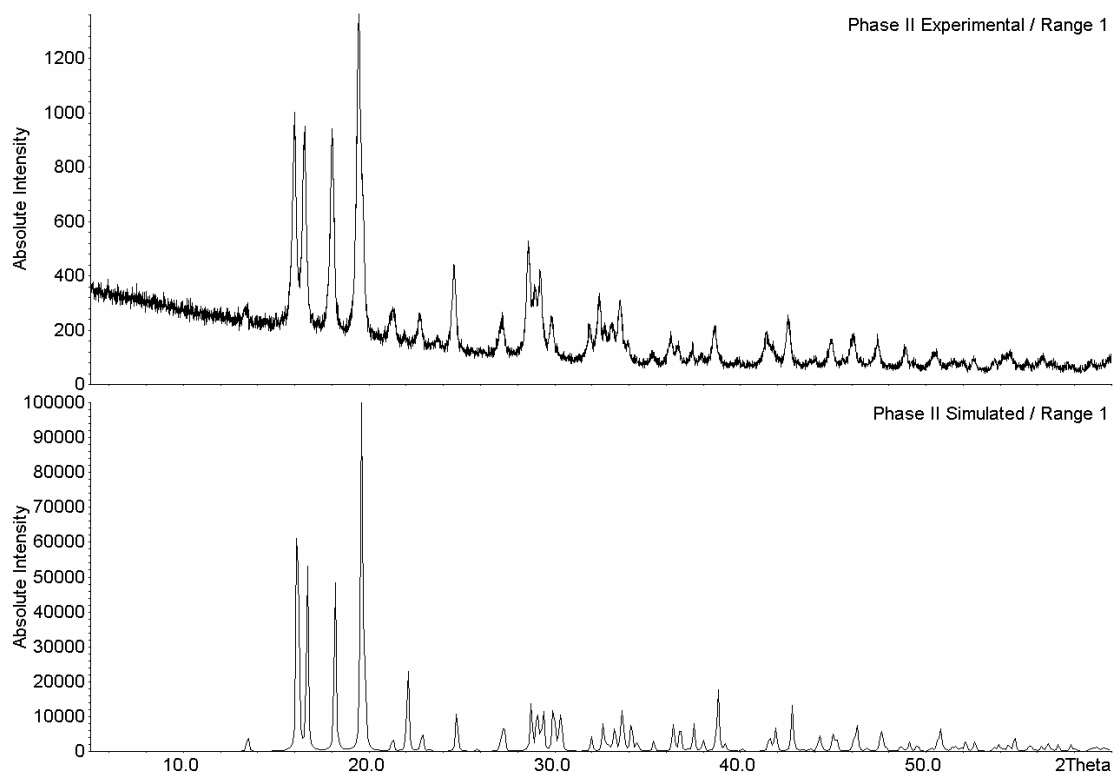

Figure S3.

Powder X-ray diffraction data for as-made (hydrated) and dehydrated Phase I

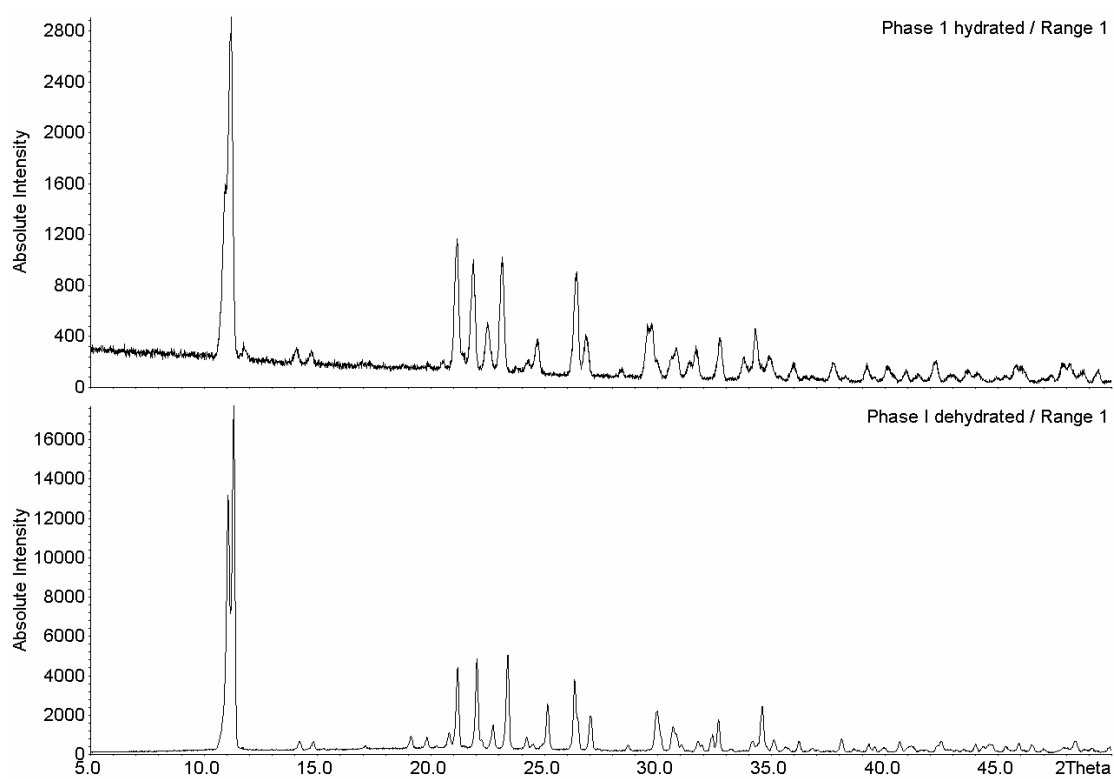

**Figure S4.**  $^{31}\text{P}$  MASNMR spectra for phase II (top) and phase I (below).

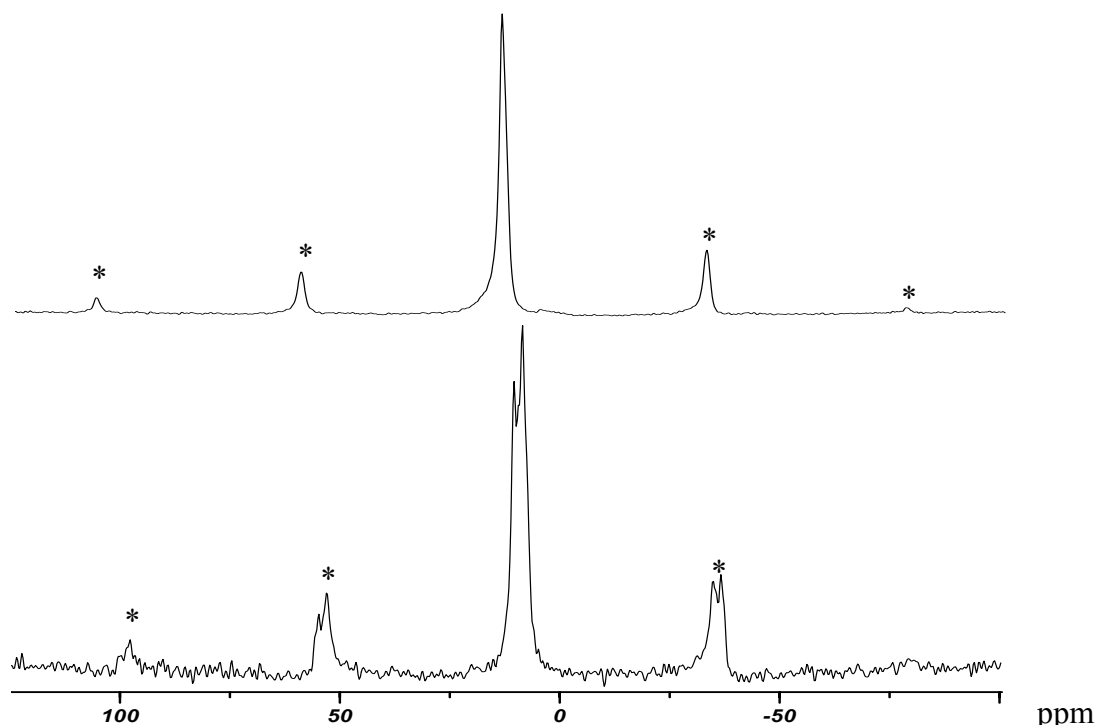

Supplement: b502417j.pdf [file b502417j.pdf]
